# Supplementary material for: A dual-functional upconversion core@shell nanostructure for white-light-emission and temperature sensing
Source: Royal Society of Chemistry journal article supplement (doi:10.1039/c6tc02218a), 2016-01-01
Supplement: c6tc02218a1.pdf [file c6tc02218a1.pdf]

## Electronic Supplementary Information

### Dual-Functional Upconversion Core@Shell Nanostructure for White-Light-Emitting and Temperature Sensing

Min Xu <sup>a</sup>, Daqin Chen <sup>a,\*</sup>, Ping Huang <sup>b</sup>, Zhongyi Wan <sup>a</sup>, Yang Zhou <sup>a</sup>, Zhenguo Ji <sup>a</sup>

<sup>a</sup> College of Materials & Environmental Engineering, Hangzhou Dianzi University,  
Hangzhou, 310018, P. R. China

<sup>b</sup> State Key Laboratory of Structural Chemistry, Fujian Institute of Research on the  
Structure of Matter, Chinese Academy of Sciences,  
Fuzhou, Fujian 350002, P. R. China

#### Corresponding Author

\*E-Mail: [dqchen@hdu.edu.cn](mailto:dqchen@hdu.edu.cn) (D. Q. Chen)

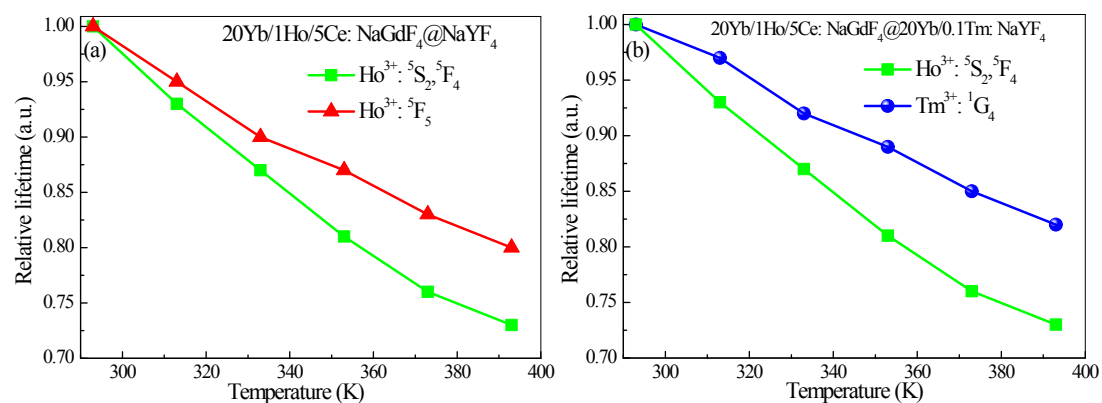

Figure S1 (a) Temperature-dependent relative lifetimes for Ho<sup>3+</sup>: <sup>5</sup>S<sub>2</sub><sup>5</sup>F<sub>4</sub> states (green emitting) and <sup>5</sup>F<sub>5</sub> one (red emitting) in the 20Yb/1Ho/5Ce: NaGdF<sub>4</sub>@NaYF<sub>4</sub> active-core@inert-shell NCs. (b) Temperature-dependent relative lifetimes for Ho<sup>3+</sup>: <sup>5</sup>S<sub>2</sub><sup>5</sup>F<sub>4</sub> states (green emitting) and Tm<sup>3+</sup>: <sup>1</sup>G<sub>4</sub> one (blue emitting) in the 20Yb/1Ho/5Ce: NaGdF<sub>4</sub>@20Yb/0.1Tm: NaYF<sub>4</sub> active-core@active-shell NCs.
